# Supplementary material
Source: Springer Nature journal article supplement (https://www.springermedizin.de/resource/supplementary/12987_2009_425_MOESM5_ESM.pdf/9612012)

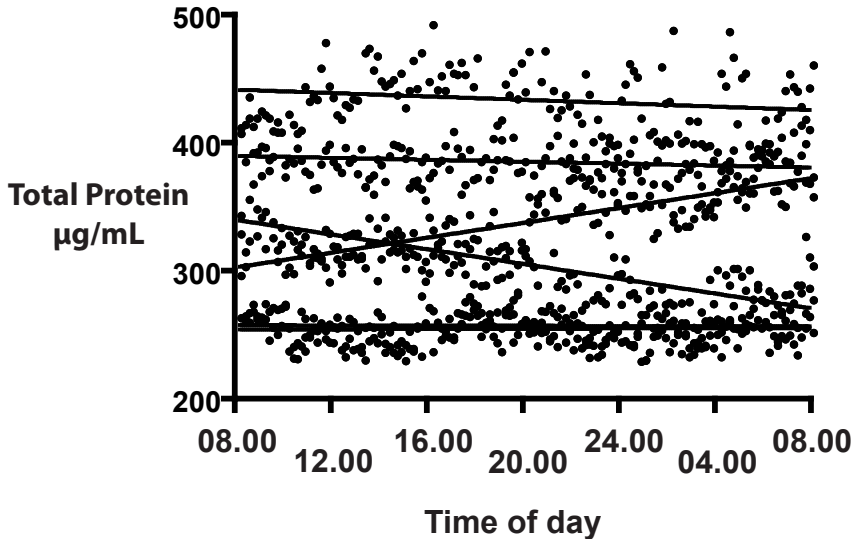

Supplement: MOESM5 [file 9612012]
